# Supplementary material for: The novel triplesalen ligand bridges three NiII-salen subunits in a meta-phenylene linkage
Source: Royal Society of Chemistry journal article supplement (doi:10.1039/b303290f), 2003-01-01
Supplement: esi.doc [file esi.doc]

**The novel triplesalen ligand bridges three NiII-salen subunits in a *meta*-phenylene linkage **

**Thorsten Glaser*, Maik Heidemeier, Thomas Lügger**

*Institut für Anorganische und Analytische Chemie, Westfälische Wilhelms-Universität Münster, Wilhelm-Klemm-Straße 8, 48149 Münster, Germany. E-mail: tglaser@uni-muenster.de; Fax: 49 251 833 3108; Tel.: 49 251 833 3135.*

**Supplementary data**

**Experimental Section**

**General methods and materials**

Infrared spectra (400-4000 cm-1) of solid samples were recorded on a Bruker Vector 22 spectrometer as KBr disks. UV/Vis/NIR absorption spectra of solutions were measured on a Varian Cary 50 spectrophotometer in the range 190-1100 nm at ambient temperatures. ESI and MALDI-TOF mass spectra were recorded on a Micromass Quattro LC mass spectrometer and a Bruker Reflex IV mass spectrometer, respectively. 1H and 13C NMR spectra were measured on a Bruker AC200 spectrometer or a Bruker AMX400 spectrometer using the solvent as internal standard. 2,4,6-Triacetyl-1,3,5-trihydroxybenzene, **H31**, was prepared according to a literature procedure.[[1]](#footnote-2)

**Synthesis**

**2,4,6-Tris(1-(2-amino-2-methyl-propylimino)-ethyl)-1,3,5-trihydroxybenzene (H32).** 2,4,6-Triacetyl-1,3,5-trihydroxybenzene **H31** (2.05 g, 8.13 mmol) was added to 1,2-diamino-2-methylpropane (7.56 mL, 72.0 mmol, 9 equiv.) under an argon blanketing atmosphere and the solution was stirred for three days. The yellow precipitate formed was collected by filtration, washed with *n*-pentane and dried in vacuum. Yield: 2.45 g (66%). 1H NMR (200.13 MHz, 25 °C, CDCl3): ** = 1.19 (s, 18 H; C(CH3)2), 2.54 (s, 9 H; CH3), 3.26 (d, 3*J*(H,H) = 5.3 Hz, 6H; CH2); 13C NMR (50.33 MHz, 25 °C, CDCl3): ** = 18.54 (CH3), 28.45 (C(*C*H3)2), 50.12 (*C*(CH3)2), 55.65 (CH2), 106.50 (br., *C*ar.-C=N), 170.88 (C=N), 185.71 (*C*ar.-OH); MS-ESI: *m/z*: 463.6 [M+H]+, 485.6 [M+Na]+; IR (KBr): ** / cm-1 = 2963m, 2925w, 2868w (all (C-H)), 1565w ((C-C)ar.), 1538vs ((C=N)), 1447m (as(CH3), (CH2)), 1419m (as(CH3) CH3C=N), 1385m + 1372m (sy(CH3) C(CH3)2), 1326m, 1261m ((Car.-O)), 1196w ((CH3) C(CH3)2), 1130w, 833w; elemental analysis calcd (%) for C24H44N6O4 (480.65 H3**3**•H2O): C 59.97, H 9.23, N 17.49; found: C 59.70, H 9.12, N 17.20.

**2,4,6-Tris(1-(2-salicylaldimino-2-methyl-propylimino)-ethyl)-1,3,5-trihydroxybenzene (H6talen).** 2,4,6-Tris(1-(2-amino-2-methyl-propylimino)-ethyl)-1,3,5-trihydroxybenzene **H32** (0.42 g, 0.80 mmol) was added to salicylaldehyde (5.0 mL, 48 mmol, 60 equiv.) under an argon blanketing atmosphere and the solution was stirred for 16 hours. The color of the solution changed to black. Excess salicylaldehyde is removed in vacuum. Yield: 0.55 g (88%). 1H NMR (200.13 MHz, 40 °C, CDCl3): ** = 1.37 (s, 18 H; C(CH3)2), 2.44 (s, 9 H; CH3), 3.48 (d, 3*J*(H,H) = 4.9 Hz, 6H; CH2), 8.34 (s, 3H, N=C-H), ar. H: 6.82 (dd, 3*J*(H,H) = 7.6, 8.2 Hz, 3H; C4), 6.91 (d, 3*J*(H,H) = 8.2 Hz, 3H; C6), 7.22 (d, 3*J*(H,H) = 7.6 Hz, 3H; C3), 7.26 (dd, 3*J*(H,H) = 7.6, 8.2 Hz, 3H; C5); 13C NMR (50.33 MHz, 25 °C, CDCl3): ** = 18.15 (CH3), 24.83 (C(*C*H3)2), 53.89 (CH2), 60.02 (*C*(CH3)2), 162.30 (N=*C*-H), 170.19, 170.58, 171.10 (all N=*C*-CH3), central ring: 104.99, 105,81, 107.04, 108.19 (all *C*-C=N), 185.0-186.2 (*C*-OH), outer rings: 161.07 (C1-OH), 118.74 (*C*2-C=N), 131.81 (C3), 118.38 (C4), 132.18 (C5), 116.92 (C6); MS-ESI (positive ion mode): *m/z*: 775.7 [M+H]+, 797.6 [M+Na]+; MS-ESI (negative ion mode): *m/z*: 773.6 [M-H]-, 809.6 [M+Cl]-; IR (KBr): ** / cm-1 = 3053w ((Car.-H)), 2970m, 2926w, 2864w (all (C-H)), 2100-3200br ((O-H)), 1630s ((C=N) HC=N), 1582m ((C-C)ar.), 1536vs ((C=N) CH3C=N), 1499w ((C-C)ar.), 1458s (as(CH3), (CH2)), 1418m (as(CH3) CH3CO)), 1388m + 1372m (sy(CH3) C(CH3)2), 1327m, 1279m ((Car.-O)), 1228w, 1171w, 1150w, 756m (oop(C-H)ar.).

**[(talen)Ni3].** Solid Ni(OAc)2•4H2O (96 mg, 0.387 mmol) was added to a solution of H6talen (100 mg, 0.129 mmol) in ethanol (15 mL). The resulting red solution was heated to reflux for 30 min. Upon cooling to room temperature an orange-red, microcrystalline precipitate formed which was filtered off, washed with diethyl ether and dried in vacuum. Yield: 95 mg (78%). 1H NMR (400.14 MHz, 25 °C, CDCl3): ** = 1.38 (s, 18 H; C(CH3)2), 2.39 (s, 9 H; CH3), 3.14 (6H, C*H*H), 7.41 (3H, N=C-H), ar. H: 6.48 (dd, 3*J*(H,H) = 7.1, 7.3 Hz, 3H; C4), 6.78 (d, 3*J*(H,H) = 8.4 Hz, 3H; C6), 7.09 (dd, 3*J*(H,H) = 7.3, 8.4 Hz, 3H; C5), 7.13 (d, 3*J*(H,H) = 7.1 Hz, 3H; C3); 13C NMR (100.63 MHz, 25 °C, CDCl3): ** = 23.45 (CH3), 26.33 (C(*C*H3)2), 66.04 and 66.18 (CH2 and *C*(CH3)2), 157.49 (N=*C*-H), central ring: 110.11 (*C*-C=N), outer rings: 120.34 (*C*2-C=N), 133.33 (C3), 114.34 (C4), 132.38 (C5), 120.91 (C6), 164.25, 170.84 and 171.30 (C1-OH, *C*-OH, and N=*C*-CH3); MS-MALDI-TOF (negative ion mode): *m/z*: 944 [M]-; IR (KBr): ** / cm-1 = 3050w, 3021w (both (Car.-H)), 2969m, 2923w, 2876w (all (C-H)), 1615s ((C=N) HC=N), 1551s br ((C=N) CH3C=N + ((C-C)ar.), 1483s, 1452s ((C-H)), 1388w ((C-H)), 1356m, 1342w, 1301m ((Car.-O)), 1192m, 1151w, 898w, 753w, 732w, 604w, 463w; elemental analysis calcd (%) for C45H48N6O6Ni3 (944.98): C 57.20, H 5.12, N 8.89; found: C 56.97, H 4.84, N 8.65.

**Figure S1.** Temperature dependence of the 1H NMR spectra (200 MHz, CDCl3) of the triplesalen ligand H6talen: OH resonances (left), aldimine resonances (center), methylene resonances (right).

**Table S1.** Electronic absorption spectral data for ligands and complexes in solution.

| compound |  / nm |  / M-1cm-1 |
| --- | --- | --- |
| H2salen | 214 | 44000 |
|  | 228 | sh |
|  | 256 | 20000 |
|  | 316 | 7900 |
| H6talen | 215 | 82000 |
|  | 253 | 42000 |
|  | 309 | 39000 |
|  | 347 | 42000 |
| [(salen)NiII] | 246 | 55000 |
|  | 256 | 48500 |
|  | 323 | 7500 |
|  | 350 | sh |
|  | 383 | sh |
|  | 406 | 6000 |
|  | 454 | sh |
|  | 543 | 140 |
| [(talen)NiII3] | 247 | 82500 |
|  | 333 | 54000 |
|  | 378 | sh |
|  | 458 | sh |
|  | 544 | 1100 |

1. H. Friese, *Chem. Ber.* **1931**, *64*, 2109-2112. [↑](#footnote-ref-2)
